# Supplementary material for: Transcriptome Profiling of Watermelon Root in Response to Short-Term Osmotic Stress
Source: PLoS One. 2016 Nov 18;11(11):e0166314. doi: 10.1371/journal.pone.0166314 (PMC5115733; doi:10.1371/journal.pone.0166314)
Supplement: S3 Table — (XLSX) [file pone.0166314.s003.xlsx]

## Sheet: Sheet1
S3 Table. GO terms enriched in differentially expressed genes
Gene Ontology term	Corrected_P-value	Up-regulated genes	Down-regulated genes
Biological process
Biological Process: RNA methylation (GO:0001510);	2.56645e-21	6	136
Biological Process: translation (GO:0006412);	5.53442e-20	4	164
Biological Process: cell proliferation (GO:0008283);	2.52445e-12	16	103
Biological Process: plant-type cell wall organization (GO:0009664);	3.21704e-09	37	122
Biological Process: pyrimidine ribonucleotide biosynthetic process (GO:0009220);	6.29711e-09	9	77
Biological Process: DNA replication initiation (GO:0006270);	1.88564e-08	1	48
Biological Process: regulation of DNA replication (GO:0006275);	1.92427e-07	1	61
Biological Process: respiratory burst involved in defense response (GO:0002679);	2.73272e-07	113	22
Biological Process: regulation of G2/M transition of mitotic cell cycle (GO:0010389);	1.7311e-06	0	40
Biological Process: response to chitin (GO:0010200);	2.20943e-06	254	71
Biological Process: cell wall modification (GO:0042545);	3.57369e-06	23	66
Biological Process: negative regulation of programmed cell death (GO:0043069);	4.2804e-05	140	30
Biological Process: polysaccharide biosynthetic process (GO:0000271);	0.000142793	38	74
Biological Process: gametophyte development (GO:0048229);	0.000201021	25	42
Biological Process: defense response to fungus (GO:0050832);	0.000276285	249	75
Biological Process: regulation of meristem growth (GO:0010075);	0.000343386	50	102
Biological Process: response to cyclopentenone (GO:0010583);	0.000571911	71	35
Biological Process: endoplasmic reticulum unfolded protein response (GO:0030968);	0.000869466	107	19
Biological Process: histone H3-K9 methylation (GO:0051567);	0.00144658	13	85
Biological Process: regulation of flower development (GO:0009909);	0.00193077	50	123
Biological Process: root morphogenesis (GO:0010015);	0.00222076	43	42
Biological Process: histone lysine methylation (GO:0034968);	0.00268733	3	40
Biological Process: response to water deprivation (GO:0009414);	0.00274193	234	110
Biological Process: transmembrane receptor protein tyrosine kinase signaling pathway (GO:0007169);	0.00299943	19	35
Biological Process: hyperosmotic salinity response (GO:0042538);	0.00383635	138	37
Biological Process: ribosome biogenesis (GO:0042254);	0.00505525	2	50
Biological Process: response to wounding (GO:0009611);	0.00524997	241	57
Biological Process: regulation of programmed cell death (GO:0043067);	0.00674347	55	18
Biological Process: hormone-mediated signaling pathway (GO:0009755);	0.00891455	70	45
Biological Process: response to ethylene (GO:0009723);	0.00931938	140	42
Biological Process: amino acid transport (GO:0006865);	0.00996582	90	28
Biological Process: regulation of plant-type hypersensitive response (GO:0010363);	0.0106799	200	62
Biological Process: protein phosphorylation (GO:0006468);	0.015489	114	89
Biological Process: microtubule-based movement (GO:0007018);	0.016532	2	29
Biological Process: protein targeting to membrane (GO:0006612);	0.0209711	197	51
Biological Process: regulation of cell size (GO:0008361);	0.0268729	27	60
Biological Process: salicylic acid biosynthetic process (GO:0009697);	0.0352581	107	34
Biological Process: mRNA export from nucleus (GO:0006406);	0.0355876	15	38
Biological Process: cytokinesis by cell plate formation (GO:0000911);	0.0389974	17	82
Cellular component
Cellular Component: nucleolus (GO:0005730);	0	73	230
Cellular Component: cytosolic large ribosomal subunit (GO:0022625);	5.81247e-18	7	84
Cellular Component: cytosolic small ribosomal subunit (GO:0022627);	5.5729e-11	0	52
Cellular Component: ribosome (GO:0005840);	5.01452e-09	8	71
Cellular Component: plasmodesma (GO:0009506);	4.32425e-06	262	358
Cellular Component: plasma membrane (GO:0005886);	1.16995e-05	606	524
Cellular Component: microtubule (GO:0005874);	0.000147767	8	36
Cellular Component: apoplast (GO:0048046);	0.00213086	141	133
Cellular Component: vacuolar membrane (GO:0005774);	0.044181	125	147
Molecular function
Molecular Function: structural constituent of ribosome (GO:0003735);	1.04339e-22	4	168
Molecular Function: protein kinase activity (GO:0004672);	0.00251953	97	54
Molecular Function: microtubule binding (GO:0008017);	0.00783848	8	31
Molecular Function: protein serine/threonine kinase activity (GO:0004674);	0.00926781	128	88
Molecular Function: receptor serine/threonine kinase binding (GO:0033612);	0.0493462	16	19
