# Supplementary material for: Transcriptome Profiling of Watermelon Root in Response to Short-Term Osmotic Stress
Source: PLoS One. 2016 Nov 18;11(11):e0166314. doi: 10.1371/journal.pone.0166314 (PMC5115733; doi:10.1371/journal.pone.0166314)
Supplement: S4 Table — (XLSX) [file pone.0166314.s004.xlsx]

## Sheet: KEGG
S4 Table. KEGG analysis of DEGs
KEGG pathway	ko_ID	P-value	Corrected_P-value	Number of DEGs	Gene ID
Ribosome	ko03010	5.375e-26	5.805e-24	124	Cla000829;Cla001098;Cla002246;Cla002365;Cla002366;Cla002420;Cla002953;Cla003439;Cla003569;Cla003600;Cla003639;Cla003782;Cla004031;Cla004124;Cla004317;Cla004337;Cla004702;Cla004860;Cla004868;Cla004936;Cla004950;Cla005191;Cla005436;Cla005686;Cla006116;Cla006168;Cla006506;Cla006965;Cla007019;Cla007069;Cla007089;Cla007237;Cla007289;Cla007560;Cla007827;Cla008069;Cla008445;Cla008658;Cla008741;Cla009257…
Valine, leucine and isoleucine degradation	ko00280	0.000101838	0.0109985	21	Cla000556;Cla000753;Cla002733;Cla002944;Cla007333;Cla008426;Cla009241;Cla009256;Cla011118;Cla012937;Cla014787;Cla015539;Cla016017;Cla019511;Cla019804;Cla021027;Cla021755;Cla021760;Cla021892;Cla022656;Cla023176
Photosynthesis - antenna proteins	ko00196	0.00164161	0.177294	11	Cla001764;Cla009752;Cla009753;Cla011748;Cla012368;Cla013483;Cla015680;Cla018117;Cla018600;Cla019105;Cla022963
alpha-Linolenic acid metabolism	ko00592	0.0016511	0.178318	7	Cla000633;Cla002393;Cla003665;Cla007400;Cla018002;Cla018886;Cla022526
Fatty acid metabolism	ko00071	0.00631506	0.682026	17	Cla000633;Cla002393;Cla002733;Cla002944;Cla003665;Cla009241;Cla010910;Cla011373;Cla015028;Cla015539;Cla017341;Cla018002;Cla019804;Cla021644;Cla021760;Cla021892;Cla023176
Nitrogen metabolism	ko00910	0.00902668	0.974881	20	Cla002791;Cla002881;Cla003596;Cla004245;Cla005111;Cla006498;Cla010695;Cla011180;Cla012779;Cla013062;Cla013371;Cla013761;Cla014016;Cla015195;Cla017785;Cla018300;Cla018301;Cla018302;Cla018303;Cla022161
Zeatin biosynthesis	ko00908	0.521705	1	6	Cla009373;Cla011205;Cla014749;Cla016444;Cla021668;Cla022463
Vitamin B6 metabolism	ko00750	0.244736	1	4	Cla008937;Cla011183;Cla016847;Cla017988
Valine, leucine and isoleucine biosynthesis	ko00290	0.904747	1	5	Cla012734;Cla013165;Cla016264;Cla018352;Cla022656
Ubiquitin mediated proteolysis	ko04120	0.967601	1	16	Cla001368;Cla002697;Cla004359;Cla004537;Cla004583;Cla004956;Cla005394;Cla005915;Cla008314;Cla008564;Cla008915;Cla011432;Cla013875;Cla014402;Cla017242;Cla023384
Ubiquinone and other terpenoid-quinone biosynthesis	ko00130	0.442685	1	8	Cla005045;Cla006029;Cla010078;Cla013546;Cla019128;Cla023238;Cla023356;Watermelon_newGene_365
Tyrosine metabolism	ko00350	0.571416	1	7	Cla002425;Cla005940;Cla012019;Cla013546;Cla015028;Cla023238;Cla023356
Tryptophan metabolism	ko00380	0.186206	1	8	Cla009241;Cla015539;Cla019804;Cla021932;Cla022226;Cla023176;Cla023447;Cla023448
Tropane, piperidine and pyridine alkaloid biosynthesis	ko00960	0.636437	1	3	Cla013546;Cla017923;Cla023356
Thiamine metabolism	ko00730	0.261885	1	3	Cla008177;Cla015056;Cla016909
Terpenoid backbone biosynthesis	ko00900	0.467059	1	11	Cla000871;Cla001204;Cla003139;Cla004566;Cla005033;Cla008842;Cla009346;Cla009347;Cla010297;Cla013358;Cla019109
Taurine and hypotaurine metabolism	ko00430	0.693793	1	3	Cla012112;Cla014175;Cla017021
Sulfur relay system	ko04122	0.820888	1	2	Cla015283;Cla017460
Sulfur metabolism	ko00920	0.246222	1	9	Cla001238;Cla001342;Cla003285;Cla006438;Cla011278;Cla014027;Cla017462;Cla020822;Cla023416
Stilbenoid, diarylheptanoid and gingerol biosynthesis	ko00945	0.932734	1	1	Cla017432
Steroid biosynthesis	ko00100	0.66742	1	5	Cla007420;Cla009766;Cla010940;Cla015192;Cla017281
Starch and sucrose metabolism	ko00500	0.434151	1	32	Cla005016;Cla006319;Cla008563;Cla008967;Cla009175;Cla009709;Cla010101;Cla010796;Cla011011;Cla011131;Cla011133;Cla011256;Cla011259;Cla011371;Cla014466;Cla014557;Cla014918;Cla014927;Cla015102;Cla015505;Cla016574;Cla017272;Cla017369;Cla017384;Cla017392;Cla017715;Cla019181;Cla020676;Cla020872;Cla021325;Cla022870;Cla023306
Spliceosome	ko03040	1	1	10	Cla004677;Cla005197;Cla009859;Cla012252;Cla014709;Cla015573;Cla017258;Cla020056;Cla021519;Cla023444
Sphingolipid metabolism	ko00600	0.570073	1	5	Cla001514;Cla007286;Cla019496;Cla022883;Cla022885
SNARE interactions in vesicular transport	ko04130	0.999008	1	1	Cla012755
Selenocompound metabolism	ko00450	0.312973	1	6	Cla002903;Cla008888;Cla011330;Cla014362;Cla017148;Cla020822
RNA transport	ko03013	0.999269	1	22	Cla000178;Cla003570;Cla004537;Cla004729;Cla006349;Cla006579;Cla006677;Cla006836;Cla007106;Cla007680;Cla009804;Cla009851;Cla012277;Cla012515;Cla013270;Cla015683;Cla016359;Cla016371;Cla017047;Cla017449;Cla020926;Cla021382
RNA polymerase	ko03020	0.829339	1	8	Cla000461;Cla004469;Cla005029;Cla015566;Cla017509;Cla021782;Cla022065;Watermelon_newGene_1754
RNA degradation	ko03018	0.960679	1	12	Cla002765;Cla005788;Cla006484;Cla006652;Cla007630;Cla012113;Cla014992;Cla017111;Cla017258;Cla019191;Cla019829;Cla020057
Ribosome biogenesis in eukaryotes	ko03008	0.0468066	1	29	Cla002885;Cla005782;Cla005912;Cla006158;Cla007323;Cla009275;Cla010232;Cla010716;Cla011462;Cla011832;Cla012132;Cla012252;Cla012277;Cla012593;Cla013270;Cla014780;Cla015073;Cla015561;Cla015904;Cla016371;Cla018335;Cla018531;Cla018571;Cla018874;Cla019266;Cla019270;Cla019829;Cla019836;Cla020594
Riboflavin metabolism	ko00740	0.654723	1	2	Cla007967;Cla017796
Regulation of autophagy	ko04140	0.261766	1	6	Cla006662;Cla006737;Cla010460;Cla011255;Cla011578;Cla019376
Pyruvate metabolism	ko00620	0.563375	1	20	Cla001476;Cla002148;Cla002259;Cla002430;Cla004216;Cla004846;Cla005324;Cla005326;Cla006459;Cla009256;Cla012653;Cla013165;Cla014068;Cla015539;Cla016366;Cla017585;Cla019804;Cla023084;Cla023176;Watermelon_newGene_287
Pyrimidine metabolism	ko00240	0.159024	1	29	Cla000461;Cla001518;Cla002593;Cla002621;Cla003218;Cla004469;Cla004740;Cla005029;Cla005332;Cla005916;Cla008409;Cla009043;Cla009590;Cla011217;Cla014362;Cla015123;Cla015566;Cla017111;Cla017509;Cla018178;Cla018549;Cla018656;Cla021068;Cla021446;Cla021629;Cla021782;Cla022065;Cla022500;Watermelon_newGene_1754
Purine metabolism	ko00230	0.213436	1	38	Cla000461;Cla001139;Cla001518;Cla002593;Cla003218;Cla004216;Cla004469;Cla004740;Cla005029;Cla006438;Cla006459;Cla008058;Cla008409;Cla009590;Cla011335;Cla011442;Cla011564;Cla013760;Cla014027;Cla015547;Cla015566;Cla016152;Cla017111;Cla017509;Cla017814;Cla018549;Cla018656;Cla019265;Cla019336;Cla020477;Cla020822;Cla021068;Cla021446;Cla021629;Cla021782;Cla022065;Cla022334;Watermelon_newGene_1754
Protein processing in endoplasmic reticulum	ko04141	0.999995	1	16	Cla002697;Cla002712;Cla003947;Cla004677;Cla005202;Cla005871;Cla006349;Cla008197;Cla008915;Cla010720;Cla011362;Cla015882;Cla016023;Cla017047;Cla022520;Cla023322
Protein export	ko03060	0.915531	1	8	Cla009757;Cla010650;Cla010909;Cla011362;Cla017982;Cla019561;Cla020708;Cla023322
Propanoate metabolism	ko00640	0.228858	1	10	Cla001476;Cla002148;Cla007333;Cla009241;Cla012937;Cla015539;Cla019804;Cla021027;Cla021760;Cla023176
Porphyrin and chlorophyll metabolism	ko00860	0.467059	1	11	Cla003139;Cla007239;Cla012169;Cla013939;Cla019109;Cla019253;Cla020208;Cla022180;Cla022543;Cla022670;Cla023399
Plant-pathogen interaction	ko04626	0.0925331	1	33	Cla000765;Cla001112;Cla001623;Cla002784;Cla005003;Cla005202;Cla005224;Cla005576;Cla005871;Cla006384;Cla006838;Cla007536;Cla008104;Cla008332;Cla008805;Cla011143;Cla012165;Cla013402;Cla013901;Cla014737;Cla015619;Cla015735;Cla016802;Cla016954;Cla017196;Cla017591;Cla017599;Cla017994;Cla018026;Cla018064;Cla018445;Cla018811;Cla021409
Plant hormone signal transduction	ko04075	0.111537	1	64	Cla000383;Cla000681;Cla000685;Cla001067;Cla001112;Cla001407;Cla001500;Cla001623;Cla001900;Cla002250;Cla002873;Cla003827;Cla003897;Cla004243;Cla004904;Cla005764;Cla005808;Cla006233;Cla006384;Cla006581;Cla006646;Cla007250;Cla007389;Cla008212;Cla008760;Cla008805;Cla009269;Cla009652;Cla009987;Cla010122;Cla011068;Cla011143;Cla011267;Cla011901;Cla012597;Cla012719;Cla013090;Cla013110;Cla013662;Cla013975…
Photosynthesis	ko00195	0.410078	1	13	Cla000152;Cla001097;Cla001790;Cla004483;Cla004703;Cla005420;Cla005429;Cla007419;Cla013942;Cla014815;Cla019423;Cla021635;Cla023217
Phosphatidylinositol signaling system	ko04070	0.960957	1	7	Cla008822;Cla012165;Cla013973;Cla016228;Cla018790;Cla018811;Cla021180
Phenylpropanoid biosynthesis	ko00940	0.177973	1	27	Cla001849;Cla003196;Cla003380;Cla003382;Cla007784;Cla011180;Cla012342;Cla012779;Cla013407;Cla013410;Cla013761;Cla014013;Cla014249;Cla014565;Cla016048;Cla017205;Cla017206;Cla017369;Cla017432;Cla018300;Cla018301;Cla018302;Cla018303;Cla019688;Cla020336;Cla020908;Cla022405
Phenylalanine, tyrosine and tryptophan biosynthesis	ko00400	0.911466	1	7	Cla007752;Cla008501;Cla012019;Cla013546;Cla016538;Cla016969;Cla023356
Phenylalanine metabolism	ko00360	0.115584	1	25	Cla001849;Cla003196;Cla003380;Cla003382;Cla011180;Cla012019;Cla012779;Cla013407;Cla013410;Cla013546;Cla013761;Cla014013;Cla014249;Cla014565;Cla017432;Cla018300;Cla018301;Cla018302;Cla018303;Cla019688;Cla020336;Cla020908;Cla022405;Cla023238;Cla023356
Phagosome	ko04145	0.810004	1	14	Cla001586;Cla001615;Cla003129;Cla004093;Cla006456;Cla007342;Cla013304;Cla014067;Cla016776;Cla017951;Cla018457;Cla022410;Cla022418;Cla023322
Peroxisome	ko04146	0.0268663	1	23	Cla000633;Cla002393;Cla002733;Cla002944;Cla003665;Cla005495;Cla005638;Cla006334;Cla008973;Cla010418;Cla010768;Cla010910;Cla011373;Cla012264;Cla012541;Cla017341;Cla017447;Cla018002;Cla021644;Cla021892;Cla021932;Cla023447;Cla023448
Pentose phosphate pathway	ko00030	0.401293	1	12	Cla000612;Cla001194;Cla001960;Cla003582;Cla012643;Cla012772;Cla012922;Cla014372;Cla016152;Cla018135;Cla018371;Cla018594
Pentose and glucuronate interconversions	ko00040	0.198733	1	18	Cla008967;Cla011133;Cla011256;Cla013736;Cla014466;Cla014557;Cla014927;Cla015102;Cla015505;Cla017272;Cla018329;Cla018594;Cla019804;Cla020532;Cla021325;Cla021445;Cla022845;Cla023176
Pantothenate and CoA biosynthesis	ko00770	0.832743	1	4	Cla000977;Cla002583;Cla016264;Cla022656
Oxidative phosphorylation	ko00190	1	1	7	Cla008334;Cla012694;Cla012729;Cla013368;Cla018232;Cla018842;Cla019961
Other glycan degradation	ko00511	0.932734	1	1	Cla005752
One carbon pool by folate	ko00670	0.342635	1	5	Cla002746;Cla010549;Cla010611;Cla015547;Cla019336
Nucleotide excision repair	ko03420	0.94852	1	9	Cla004740;Cla008409;Cla008863;Cla013337;Cla013923;Cla018656;Cla019052;Cla020917;Cla023188
Non-homologous end-joining	ko03450	0.963121	1	1	Cla023428
Nicotinate and nicotinamide metabolism	ko00760	0.509596	1	4	Cla006312;Cla010033;Cla012264;Cla021629
Natural killer cell mediated cytotoxicity	ko04650	0.199042	1	7	Cla001586;Cla004093;Cla008298;Cla016776;Cla016802;Cla021155;Cla022410
mRNA surveillance pathway	ko03015	1	1	3	Cla001412;Cla007356;Cla012515
Mismatch repair	ko03430	0.0610001	1	13	Cla008409;Cla008863;Cla013337;Cla013923;Cla015057;Cla015135;Cla018467;Cla018520;Cla018992;Cla019052;Cla019624;Cla020917;Cla023188
Lysine degradation	ko00310	0.570309	1	4	Cla009241;Cla015539;Cla019804;Cla023176
Lysine biosynthesis	ko00300	0.342635	1	5	Cla002202;Cla006475;Cla010271;Cla011891;Cla015539
Limonene and pinene degradation	ko00903	0.42396	1	3	Cla009241;Cla019804;Cla023176
Isoquinoline alkaloid biosynthesis	ko00950	0.42396	1	3	Cla005940;Cla013546;Cla023356
Inositol phosphate metabolism	ko00562	0.967289	1	8	Cla008822;Cla012937;Cla013973;Cla016228;Cla016814;Cla019282;Cla021180;Watermelon_newGene_1030
Homologous recombination	ko03440	0.045172	1	15	Cla008409;Cla008863;Cla011127;Cla011197;Cla013022;Cla013068;Cla016835;Cla017489;Cla018018;Cla018520;Cla019052;Cla019953;Cla020581;Cla020917;Cla023428
Histidine metabolism	ko00340	0.856025	1	3	Cla015539;Cla019804;Cla023176
Glyoxylate and dicarboxylate metabolism	ko00630	0.352847	1	8	Cla002430;Cla012541;Cla013500;Cla014016;Cla014068;Cla015282;Cla017090;Cla020400
Glycosphingolipid biosynthesis - globo series	ko00603	0.244736	1	4	Cla005752;Cla007286;Cla022883;Cla022885
Glycosphingolipid biosynthesis - ganglio series	ko00604	0.698355	1	1	Cla005752
Glycosaminoglycan degradation	ko00531	0.950191	1	1	Cla005752
Glycolysis / Gluconeogenesis	ko00010	0.704359	1	25	Cla001960;Cla004216;Cla004846;Cla006319;Cla006459;Cla006530;Cla008563;Cla009256;Cla011259;Cla012643;Cla012922;Cla013455;Cla013611;Cla014372;Cla015028;Cla015539;Cla016366;Cla018090;Cla018135;Cla018371;Cla019123;Cla019804;Cla021185;Cla023084;Cla023176
Glycine, serine and threonine metabolism	ko00260	0.257408	1	14	Cla002202;Cla002746;Cla006334;Cla008937;Cla009256;Cla010549;Cla011183;Cla012017;Cla012565;Cla013093;Cla015539;Cla016847;Cla018036;Cla018352
Glycerophospholipid metabolism	ko00564	0.100679	1	18	Cla001234;Cla003998;Cla005520;Cla005886;Cla006300;Cla009281;Cla009441;Cla012356;Cla012695;Cla015156;Cla016244;Cla017972;Cla018790;Cla018886;Cla019282;Cla020340;Cla022306;Watermelon_newGene_1030
Glycerolipid metabolism	ko00561	0.0157425	1	16	Cla001234;Cla003998;Cla005520;Cla006300;Cla007286;Cla008683;Cla015156;Cla015539;Cla016244;Cla016674;Cla017972;Cla018790;Cla019804;Cla022883;Cla022885;Cla023176
Glutathione metabolism	ko00480	0.0544292	1	20	Cla000612;Cla001194;Cla003218;Cla010418;Cla010856;Cla011457;Cla014175;Cla014675;Cla014814;Cla015833;Cla017855;Cla018942;Cla019780;Cla020010;Cla021039;Cla021338;Cla021389;Cla021430;Cla021634;Cla021972
Galactose metabolism	ko00052	0.144232	1	12	Cla006319;Cla007286;Cla008563;Cla009175;Cla011259;Cla011349;Cla012643;Cla012809;Cla014372;Cla020872;Cla022883;Cla022885
Fructose and mannose metabolism	ko00051	0.101386	1	15	Cla001960;Cla003612;Cla004587;Cla006214;Cla006319;Cla008563;Cla011259;Cla012643;Cla012922;Cla013236;Cla014372;Cla014592;Cla018135;Cla018371;Cla022845
Folate biosynthesis	ko00790	0.820888	1	2	Cla014926;Cla016905
Flavonoid biosynthesis	ko00941	0.911521	1	2	Cla017432;Cla020685
Flavone and flavonol biosynthesis	ko00944	0.450657	1	1	Cla010664
Fatty acid biosynthesis	ko00061	0.163546	1	10	Cla000627;Cla001476;Cla002148;Cla002633;Cla003203;Cla004792;Cla012137;Cla013504;Cla013862;Cla014487
Ether lipid metabolism	ko00565	0.167869	1	6	Cla005886;Cla009281;Cla018886;Cla019282;Cla020340;Watermelon_newGene_1030
Endocytosis	ko04144	0.998484	1	7	Cla004677;Cla005095;Cla008643;Cla009262;Cla009281;Cla014402;Cla021180
DNA replication	ko03030	0.0265336	1	17	Cla001004;Cla001518;Cla004740;Cla008409;Cla008863;Cla009910;Cla010846;Cla013337;Cla013923;Cla015137;Cla018520;Cla018549;Cla018656;Cla019052;Cla020917;Cla021359;Cla023188
Diterpenoid biosynthesis	ko00904	0.445248	1	4	Cla009774;Cla019586;Cla020710;Watermelon_newGene_1985
Cysteine and methionine metabolism	ko00270	0.101987	1	25	Cla001238;Cla002202;Cla002903;Cla003285;Cla006634;Cla007521;Cla007532;Cla008888;Cla010547;Cla011278;Cla011330;Cla012019;Cla013516;Cla013546;Cla015852;Cla016287;Cla016825;Cla017148;Cla017462;Cla021397;Cla021593;Cla021634;Cla021972;Cla023189;Cla023356
Cyanoamino acid metabolism	ko00460	0.264736	1	10	Cla001238;Cla002746;Cla010549;Cla014175;Cla015500;Cla017369;Cla020575;Cla022833;Cla022835;Cla022840
Citrate cycle (TCA cycle)	ko00020	0.893637	1	9	Cla002430;Cla004846;Cla009256;Cla010418;Cla013500;Cla014068;Cla015282;Cla016366;Cla023084
Circadian rhythm - plant	ko04712	0.744029	1	3	Cla007584;Cla021900;Cla023010
Circadian rhythm - mammal	ko04710	0.571949	1	3	Cla007592;Cla008915;Cla015391
Carotenoid biosynthesis	ko00906	0.571416	1	7	Cla005404;Cla005457;Cla005910;Cla006149;Cla009122;Cla009779;Cla020214
Carbon fixation in photosynthetic organisms	ko00710	0.716383	1	16	Cla001960;Cla002259;Cla002430;Cla004216;Cla004846;Cla006459;Cla012653;Cla012922;Cla013455;Cla014068;Cla015506;Cla018135;Cla018371;Cla018594;Cla020400;Cla023084
Caffeine metabolism	ko00232	0.450657	1	1	Cla020477
Butanoate metabolism	ko00650	0.984766	1	2	Cla004293;Cla009241
Brassinosteroid biosynthesis	ko00905	0.0557526	1	3	Cla004341;Cla014252;Cla014524
Biotin metabolism	ko00780	0.698355	1	1	Cla007216
Biosynthesis of unsaturated fatty acids	ko01040	0.246213	1	11	Cla000627;Cla000633;Cla002393;Cla002733;Cla002944;Cla003665;Cla008157;Cla012137;Cla013862;Cla018002;Cla021892
beta-Alanine metabolism	ko00410	0.451935	1	9	Cla007333;Cla009241;Cla015539;Cla019804;Cla021027;Cla021634;Cla021760;Cla021972;Cla023176
Base excision repair	ko03410	0.727651	1	7	Cla004740;Cla008409;Cla013337;Cla015093;Cla016882;Cla017557;Cla018656
Basal transcription factors	ko03022	0.999992	1	1	Cla004737
Ascorbate and aldarate metabolism	ko00053	0.380416	1	10	Cla004752;Cla004755;Cla010412;Cla015539;Cla015833;Cla016307;Cla016814;Cla017711;Cla019804;Cla023176
Arginine and proline metabolism	ko00330	0.530854	1	18	Cla003596;Cla004999;Cla006970;Cla008345;Cla010271;Cla010695;Cla012019;Cla015195;Cla015539;Cla016180;Cla016474;Cla017928;Cla019569;Cla019804;Cla021634;Cla021972;Cla023055;Cla023176
Arachidonic acid metabolism	ko00590	0.0629561	1	6	Cla010856;Cla011457;Cla014175;Cla018886;Cla018920;Cla021039
Aminoacyl-tRNA biosynthesis	ko00970	0.994357	1	6	Cla005235;Cla005762;Cla011253;Cla014357;Cla015666;Cla020254
Amino sugar and nucleotide sugar metabolism	ko00520	0.663214	1	23	Cla003612;Cla005016;Cla005752;Cla006319;Cla008084;Cla008563;Cla008682;Cla009857;Cla010796;Cla011011;Cla011259;Cla011349;Cla012809;Cla013236;Cla014592;Cla014918;Cla016574;Cla016653;Cla016655;Cla017384;Cla019559;Cla022249;Cla022870
Alanine, aspartate and glutamate metabolism	ko00250	0.351868	1	14	Cla003596;Cla004245;Cla005332;Cla006334;Cla008058;Cla008345;Cla010695;Cla012017;Cla012019;Cla013371;Cla015195;Cla015506;Cla018036;Cla023055
ABC transporters	ko02010	0.486887	1	2	Cla010534;Cla022922
